# Supplementary material for: Self-powered graphene-based composites for rain energy harvesting
Source: Royal Society of Chemistry journal article supplement (doi:10.1039/d4ya00479e), 2024-01-01
Supplement: d4ya00479e1.pdf [file d4ya00479e1.pdf]

## **Self-powered graphene-based composites for rain energy harvesting**

Yi Zheng,<sup>†a</sup> Hongyu Zheng,<sup>†a</sup> Yuanchong Yue,<sup>a</sup> Liying Lu,<sup>b</sup> Yingli Wang,<sup>\*a</sup> and Qunwei Tang<sup>a</sup>

(a) Contact angle:  $80.77^\circ$

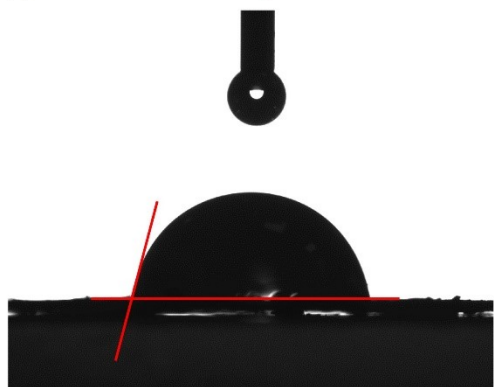

(b) Contact angle:  $106.04^\circ$

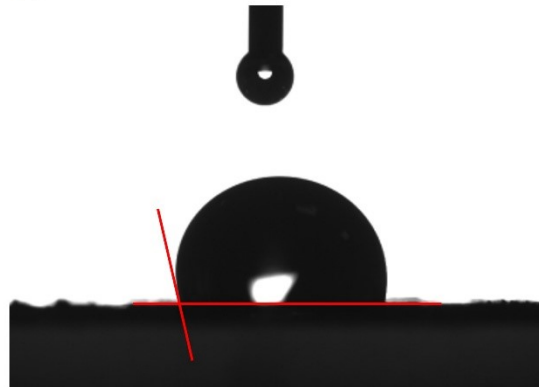

**Fig. S1** The contact angles of 94 wt% G-CB/PVC films by dropping (a) 0.6 M NaCl droplet and (b) pure water, respectively.

---

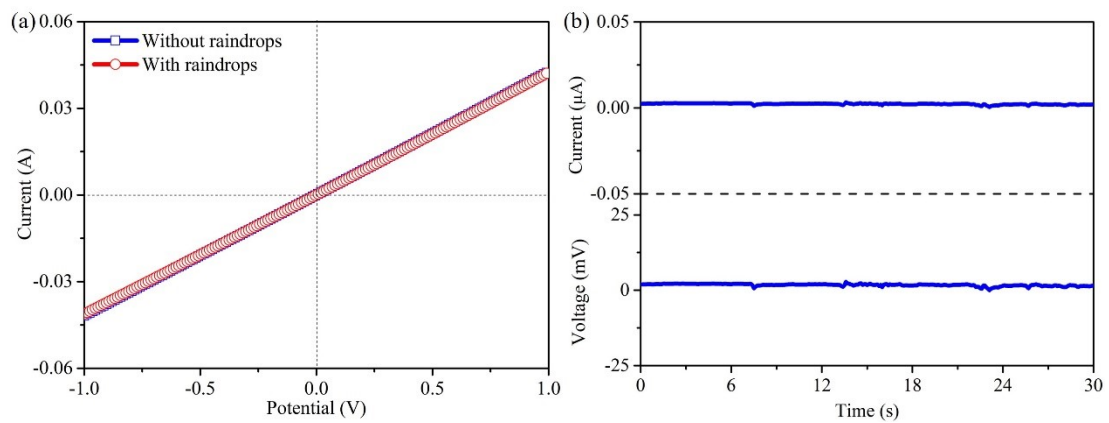

**Fig. S2** (a) Linear plots of the current as a function of the voltage for 94 wt% G-CB/PVC films with and without 0.6 M NaCl solution. (b) The curve of deionized water instead of 0.6 M NaCl aqueous solution.

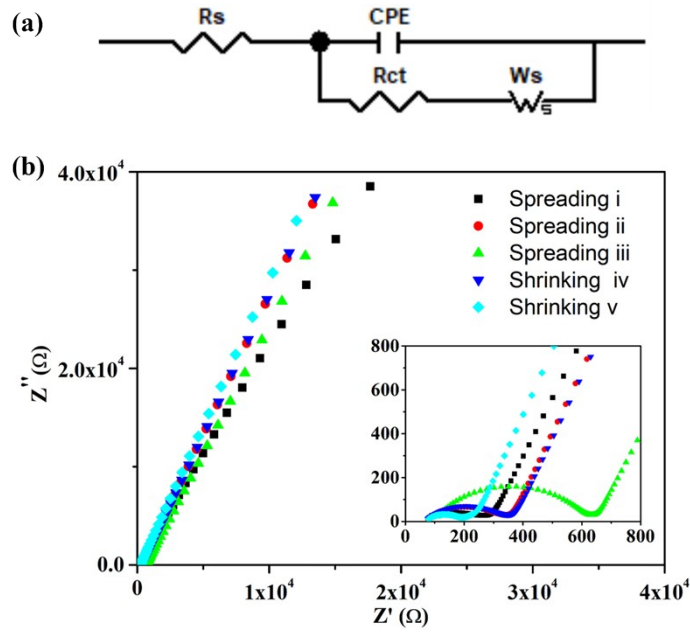

**Fig. S3** EIS curve generated when raindrops spread and shrink on 94 wt% G-CB/PVC composite films.

$R_s$  increases and subsequently decreases during the spreading/shrinking processes of raindrops, representing the adsorption/desorption behaviors between cations and electrons at the rainwater/film interface. Meanwhile, the positive charges move during raindrop spreading/shrinking processes, producing charge-transfer resistance ( $R_{ct}$ ) and charge-diffusion resistance ( $W$ ). In this fashion,  $W$  has a peak value under the maximum spreading condition, leading to a similar evolution in electron migration for  $R_{ct}$ .

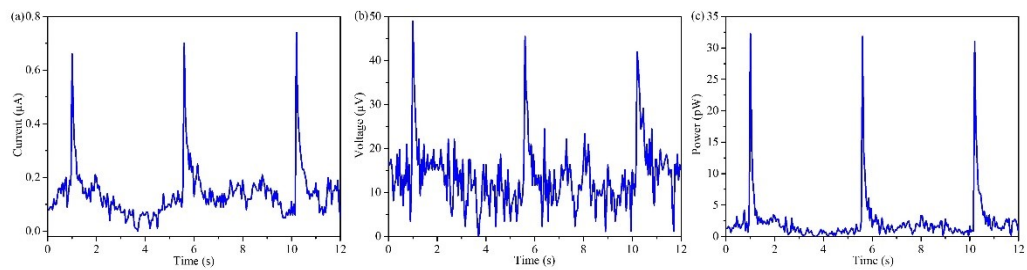

**Fig. S4** The (a) current, (b) voltage and (c) power yielded by dropping real rainwater on the surface of 94wt% G-CB/PVC composite films at an injection velocity of 40 mL h<sup>-1</sup>.

---

**Table S1** The electrochemical parameters extracted from CV and EIS characterizations.

| Processes        | Area (cm <sup>2</sup> ) | Rs (ohm) | Rct (ohm) | W (ohm) | C (mF) |
|------------------|-------------------------|----------|-----------|---------|--------|
| Before spreading | 0                       | 0        | 0         | 0       | 0      |
| Spreading i      | 6                       | 68.5     | 276.5     | 139.6   | 0.397  |
| Spreading ii     | 12                      | 70.6     | 332.8     | 164.5   | 0.921  |
| Spreading iii    | 35                      | 108.5    | 620.2     | 240.5   | 2.612  |
| Shrinking iv     | 20                      | 78.4     | 352.7     | 167     | 1.383  |
| Shrinking v      | 2                       | 62.7     | 183.1     | 93.8    | 0.249  |
| Final state      | 0                       | 0        | 0         | 0       | 0      |

**Table S2** Electrical data produced by dropping NaCl aqueous solutions with different concentrations on 94 wt% G-CB/PVC film at an injection velocity of 60 mL h<sup>-1</sup>.

| Concentration (M) | Current ( $\mu$ A) | Voltage (mV)     | Power (nW)      |
|-------------------|--------------------|------------------|-----------------|
| 0.2               | 0.64 $\pm$ 0.07    | 0.05 $\pm$ 0.008 | 0.03 $\pm$ 0.01 |
| 0.4               | 1.27 $\pm$ 0.51    | 0.09 $\pm$ 0.011 | 0.11 $\pm$ 0.06 |
| 0.6               | 1.36 $\pm$ 0.18    | 0.21 $\pm$ 0.02  | 0.28 $\pm$ 0.03 |
| 1                 | 4.62 $\pm$ 1.62    | 0.63 $\pm$ 0.05  | 2.91 $\pm$ 0.45 |
| 2                 | 7.90 $\pm$ 1.50    | 1.08 $\pm$ 0.18  | 8.46 $\pm$ 0.86 |

**Table S3** Electrical signals yielded by dropping real rain collecting from QingDao of China on the surface of G-CB/PVC film.

|           | Average current ( $\mu\text{A}$ ) | Average voltage ( $\mu\text{V}$ ) | Average power (pW) |
|-----------|-----------------------------------|-----------------------------------|--------------------|
| Real rain | $0.23 \pm 0.04$                   | $29.90 \pm 8.90$                  | $13.36 \pm 3.50$   |
